# Supplementary material for: Kisspeptin receptor agonist (FTM080) increased plasma concentrations of luteinizing hormone in anestrous ewes
Source: PeerJ. 2015 Nov 5;3:e1382. doi: 10.7717/peerj.1382 (PMC4647575; doi:10.7717/peerj.1382)
Supplement: Supplemental Information 1 — Effect of i.v. KISS1R agonist, FTM080, on plasma LH concentrations in anestrous ewes (n = 3; Exp. 1) and the effect of i.v. KP-10 and FTM080, KISS1R agonist, on plasma LH concentrations in anestrous ewes (n = 4; Exp. 2). [file peerj-03-1382-s001.xlsx]

## Sheet: Experiment 1
Animal	Treatment	Time	LH (ng / mL)
I	SW	-60	0.6525
E	SW	-60	0.08175
A	SW	-60	0.188
M	SW	-60	0.18475
I	SW	-45	0.55
E	SW	-45	0.06825
A	SW	-45	0.0845
M	SW	-45	0.131
I	SW	-30	0.62975
E	SW	-30	0.044075
A	SW	-30	0.345
M	SW	-30	0.924235
I	SW	-15	0.45775
E	SW	-15	0.0597
A	SW	-15	0.15975
M	SW	-15	0.318
I	SW	0	0.3644
E	SW	0	0.072825
A	SW	0	0.125
M	SW	0	0.175
I	SW	15	0.51175
E	SW	15	0.51285
A	SW	15	0.18425
M	SW	15	0.181
I	SW	30	0.23625
E	SW	30	0.0626
A	SW	30	0.1895
M	SW	30	0.216
I	SW	45	0.223
E	SW	45	0.072
A	SW	45	0.43375
M	SW	45	0.16325
I	SW	60	0.206
E	SW	60	0.026875
A	SW	60	0.45525
M	SW	60	0.23275
C	TOM·80	-60	0.16325
G	TOM·80	-60	0.10725
K	TOM·80	-60	0.1135
O	TOM·80	-60	0.115175
C	TOM·80	-45	0.208
G	TOM·80	-45	0.05245
K	TOM·80	-45	0.187
O	TOM·80	-45	0.063225
C	TOM·80	-30	0.23075
G	TOM·80	-30	0.05655
K	TOM·80	-30	0.17175
O	TOM·80	-30	0.377
C	TOM·80	-15	0.4125
G	TOM·80	-15	0.067
K	TOM·80	-15	0.21925
O	TOM·80	-15	0.253
C	TOM·80	0	0.29925
G	TOM·80	0	0.03705
K	TOM·80	0	0.0316
O	TOM·80	0	0.19875
C	TOM·80	15	0.4695
G	TOM·80	15	1.2775
K	TOM·80	15	1.2325
O	TOM·80	15	0.555
C	TOM·80	30	0.33425
G	TOM·80	30	0.785
K	TOM·80	30	1.54
O	TOM·80	30	0.575
C	TOM·80	45	0.2275
G	TOM·80	45	0.41875
K	TOM·80	45	1.1175
O	TOM·80	45	0.9275
C	TOM·80	60	0.22875
G	TOM·80	60	0.3
K	TOM·80	60	0.8825
O	TOM·80	60	0.7575

## Sheet: Experiment 2
Ewe	Tx	Time	LH (ng/mL)
A	SW	-60	0.65423
E	SW	-60	2.5332
K	SW	-60	0.897
P	SW	-60	0.03
U	SW	-60	0.03
A	SW	-45	0.03
E	SW	-45	0.85849
K	SW	-45	0.46052
P	SW	-45	0.03
U	SW	-45	0.03
A	SW	-30	0.6659
E	SW	-30	1.6203
K	SW	-30	0.38103
P	SW	-30	0.36134
U	SW	-30	0.03
A	SW	-15	0.03
E	SW	-15	0.21117
K	SW	-15	0.10771
P	SW	-15	0.32244
U	SW	-15	0.03
A	SW	0	2.1855
E	SW	0	0.14575
K	SW	0	0.03
P	SW	0	1.6359
U	SW	0	0.873608
A	SW	15	2.0986
E	SW	15	2.3058
K	SW	15	2.0477
P	SW	15	0.03
U	SW	15	0.16051
A	SW	30	0.31015
E	SW	30	0.52453
K	SW	30	0.895107
P	SW	30	0.03
U	SW	30	0.96026
A	SW	45	0.54299
E	SW	45	0.54671
K	SW	45	2.4902
P	SW	45	0.28374
U	SW	45	0.03
A	SW	60	0.4133
E	SW	60	0.54789
K	SW	60	0.21543
P	SW	60	1.3629
U	SW	60	0.03
A	SW	75	0.52938
E	SW	75	0.3188
K	SW	75	2.6425
P	SW	75	0.65663
U	SW	75	1.3163
A	SW	90	0.60576
E	SW	90	0.90266
K	SW	90	0.27947
P	SW	90	0.16638
U	SW	90	0.542686
A	SW	105	2.1932
E	SW	105	4.6566
K	SW	105	2.647
P	SW	105	1.4828
U	SW	105	0.03
A	SW	120	0.03
E	SW	120	2.9992
K	SW	120	0.03
P	SW	120	0.31068
U	SW	120	0.2654
A	SW	135	3.7545
E	SW	135	2.0503
K	SW	135	0.03
P	SW	135	0.03
U	SW	135	0.03
A	SW	150	3.05078
E	SW	150	1.8104
K	SW	150	1.6034
P	SW	150	0.03
U	SW	150	0.03
A	SW	165	2.1503
E	SW	165	1.258
K	SW	165	0.829482
P	SW	165	0.35451
U	SW	165	0.03
A	SW	180	2.3718
E	SW	180	0.909
K	SW	180	1.04684
P	SW	180	0.49368
U	SW	180	0.03
A	SW	195	2.6641
E	SW	195	2.6919
K	SW	195	2.4711
P	SW	195	2.1566
U	SW	195	0.03
A	SW	210	1.1638
E	SW	210	0.61473
K	SW	210	0.26743
P	SW	210	0.26844
U	SW	210	0.03
A	SW	225	0.79156
E	SW	225	1.2851
K	SW	225	2.3574
P	SW	225	0.15663
U	SW	225	0.03
A	SW	240	0.68048
E	SW	240	0.42129
K	SW	240	0.50309
P	SW	240	0.4671
U	SW	240	0.095195
B	KP	-60	0.03
G	KP	-60	0.745322
L	KP	-60	0.18532
Q	KP	-60	2.0384
B	KP	-45	0.37441
G	KP	-45	0.29138
L	KP	-45	0.38831
Q	KP	-45	1.6135
B	KP	-30	0.51907
G	KP	-30	0.35212
L	KP	-30	0.18495
Q	KP	-30	0.03
B	KP	-15	2.3485
G	KP	-15	1.647
L	KP	-15	2.1351
Q	KP	-15	0.23993
B	KP	0	0.697067
G	KP	0	0.570057
L	KP	0	1.2686
Q	KP	0	0.03
B	KP	15	4.0306
G	KP	15	6.3281
L	KP	15	3.2044
Q	KP	15	3.9842
B	KP	30	4.7002
G	KP	30	4.2152
L	KP	30	4.9973
Q	KP	30	8.2991
B	KP	45	4.4487
G	KP	45	2.0514
L	KP	45	2.6903
Q	KP	45	5.2184
B	KP	60	4.6828
G	KP	60	2.0868
L	KP	60	0.03
Q	KP	60	2.6651
B	KP	75	0.03
G	KP	75	1.7367
L	KP	75	2.1697
Q	KP	75	2.58
B	KP	90	3.3252
G	KP	90	1.5126
L	KP	90	1.4075
Q	KP	90	1.8689
B	KP	105	1.72738
G	KP	105	1.31739
L	KP	105	0.90236
Q	KP	105	1.1236
B	KP	120	1.4579
G	KP	120	1.04375
L	KP	120	1.18303
Q	KP	120	1.14034
B	KP	135	1.212
G	KP	135	1.19189
L	KP	135	0.03
Q	KP	135	1.05056
B	KP	150	0.03
G	KP	150	0.03
L	KP	150	0.68366
Q	KP	150	0.75746
B	KP	165	0.03
G	KP	165	2.0663
L	KP	165	0.829482
Q	KP	165	1.6868
B	KP	180	0.69013
G	KP	180	0.03
L	KP	180	0.28856
Q	KP	180	1.7931
B	KP	195	0.6014
G	KP	195	0.54697
L	KP	195	0.941045
Q	KP	195	0.88506
B	KP	210	0.03
G	KP	210	0.572468
L	KP	210	0.21893
Q	KP	210	2.1112
B	KP	225	0.26545
G	KP	225	0.43442
L	KP	225	0.34958
Q	KP	225	0.03
B	KP	240	0.03
G	KP	240	0.61206
L	KP	240	2.2671
Q	KP	240	0.45903
C	FTM080: 500	-60	0.03
H	FTM080: 500	-60	0.872035
M	FTM080: 500	-60	0.068067
R	FTM080: 500	-60	0.03
C	FTM080: 500	-45	0.43077
H	FTM080: 500	-45	0.03
M	FTM080: 500	-45	1.19496
R	FTM080: 500	-45	0.03
C	FTM080: 500	-30	0.03
H	FTM080: 500	-30	1.4176
M	FTM080: 500	-30	0.24063
R	FTM080: 500	-30	0.23606
C	FTM080: 500	-15	0.18751
H	FTM080: 500	-15	1.2124
M	FTM080: 500	-15	1.17442
R	FTM080: 500	-15	0.03
C	FTM080: 500	0	0.51215
H	FTM080: 500	0	0.24589
M	FTM080: 500	0	0.5007
R	FTM080: 500	0	0.03
C	FTM080: 500	15	3.8181
H	FTM080: 500	15	1.1013
M	FTM080: 500	15	1.325
R	FTM080: 500	15	1.68
C	FTM080: 500	30	1.7424
H	FTM080: 500	30	0.861523
M	FTM080: 500	30	0.31911
R	FTM080: 500	30	0.03
C	FTM080: 500	45	1.3181
H	FTM080: 500	45	0.69635
M	FTM080: 500	45	1.4646
R	FTM080: 500	45	0.03
C	FTM080: 500	60	2.2731
H	FTM080: 500	60	1.7037
M	FTM080: 500	60	1.8386
R	FTM080: 500	60	0.03
C	FTM080: 500	75	0.98446
H	FTM080: 500	75	0.46904
M	FTM080: 500	75	0.41358
R	FTM080: 500	75	0.18844
C	FTM080: 500	90	1.04351
H	FTM080: 500	90	0.8108
M	FTM080: 500	90	0.4743
R	FTM080: 500	90	0.03
C	FTM080: 500	105	1.07195
H	FTM080: 500	105	0.53356
M	FTM080: 500	105	0.03
R	FTM080: 500	105	2.161
C	FTM080: 500	120	0.56213
H	FTM080: 500	120	0.03
M	FTM080: 500	120	0.03
R	FTM080: 500	120	0.03
C	FTM080: 500	135	0.65845
H	FTM080: 500	135	0.93275
M	FTM080: 500	135	0.22253
R	FTM080: 500	135	0.4438
C	FTM080: 500	150	0.03
H	FTM080: 500	150	1.3009
M	FTM080: 500	150	0.82942
R	FTM080: 500	150	0.24793
C	FTM080: 500	165	0.46978
H	FTM080: 500	165	2.2753
M	FTM080: 500	165	2.0984
R	FTM080: 500	165	0.74069
C	FTM080: 500	180	0.88653
H	FTM080: 500	180	0.03
M	FTM080: 500	180	3.5782
R	FTM080: 500	180	0.23721
C	FTM080: 500	195	0.25392
H	FTM080: 500	195	0.20007
M	FTM080: 500	195	0.03
R	FTM080: 500	195	0.03
C	FTM080: 500	210	1.7128
H	FTM080: 500	210	0.03
M	FTM080: 500	210	0.68973
R	FTM080: 500	210	0.30463
C	FTM080: 500	225	0.23938
H	FTM080: 500	225	0.19525
M	FTM080: 500	225	0.47845
R	FTM080: 500	225	0.32747
C	FTM080: 500	240	0.45469
H	FTM080: 500	240	0.710668
M	FTM080: 500	240	0.03
R	FTM080: 500	240	0.839137
D	FTM080: 2500	-60	0.34409
I	FTM080: 2500	-60	0.22127
N	FTM080: 2500	-60	1.4397
S	FTM080: 2500	-60	0.26379
D	FTM080: 2500	-45	0.29933
I	FTM080: 2500	-45	0.964273
N	FTM080: 2500	-45	0.17088
S	FTM080: 2500	-45	0.03
D	FTM080: 2500	-30	0.26312
I	FTM080: 2500	-30	0.47454
N	FTM080: 2500	-30	0.17311
S	FTM080: 2500	-30	0.03
D	FTM080: 2500	-15	1.9103
I	FTM080: 2500	-15	0.56378
N	FTM080: 2500	-15	0.03
S	FTM080: 2500	-15	0.03
D	FTM080: 2500	0	2.2763
I	FTM080: 2500	0	2.0301
N	FTM080: 2500	0	0.03
S	FTM080: 2500	0	0.03
D	FTM080: 2500	15	2.6569
I	FTM080: 2500	15	1.72942
N	FTM080: 2500	15	1.7812
S	FTM080: 2500	15	2.8547
D	FTM080: 2500	30	1.3208
I	FTM080: 2500	30	1.4588
N	FTM080: 2500	30	1.2867
S	FTM080: 2500	30	0.03
D	FTM080: 2500	45	2.0261
I	FTM080: 2500	45	1.1908
N	FTM080: 2500	45	1.35995
S	FTM080: 2500	45	1.21728
D	FTM080: 2500	60	0.03
I	FTM080: 2500	60	0.69761
N	FTM080: 2500	60	0.60357
S	FTM080: 2500	60	0.44959
D	FTM080: 2500	75	0.938593
I	FTM080: 2500	75	2.5075
N	FTM080: 2500	75	0.35475
S	FTM080: 2500	75	0.35242
D	FTM080: 2500	90	0.60055
I	FTM080: 2500	90	0.74595
N	FTM080: 2500	90	1.00666
S	FTM080: 2500	90	0.36446
D	FTM080: 2500	105	0.21522
I	FTM080: 2500	105	0.80827
N	FTM080: 2500	105	0.28626
S	FTM080: 2500	105	0.343283
D	FTM080: 2500	120	0.51095
I	FTM080: 2500	120	0.60404
N	FTM080: 2500	120	2.3147
S	FTM080: 2500	120	0.03
D	FTM080: 2500	135	0.33609
I	FTM080: 2500	135	0.34262
N	FTM080: 2500	135	2.5527
S	FTM080: 2500	135	2.4544
D	FTM080: 2500	150	0.55155
I	FTM080: 2500	150	0.43823
N	FTM080: 2500	150	0.16149
S	FTM080: 2500	150	1.0774
D	FTM080: 2500	165	0.54727
I	FTM080: 2500	165	0.30653
N	FTM080: 2500	165	2.3445
S	FTM080: 2500	165	0.74092
D	FTM080: 2500	180	0.630015
I	FTM080: 2500	180	0.18453
N	FTM080: 2500	180	1.7971
S	FTM080: 2500	180	0.98051
D	FTM080: 2500	195	0.36804
I	FTM080: 2500	195	0.26212
N	FTM080: 2500	195	0.03
S	FTM080: 2500	195	0.60436
D	FTM080: 2500	210	0.33804
I	FTM080: 2500	210	0.2931
N	FTM080: 2500	210	0.03
S	FTM080: 2500	210	1.0774
D	FTM080: 2500	225	0.19571
I	FTM080: 2500	225	0.30439
N	FTM080: 2500	225	0.03
S	FTM080: 2500	225	0.19532
D	FTM080: 2500	240	0.48653
I	FTM080: 2500	240	1.1507
N	FTM080: 2500	240	1.7245
S	FTM080: 2500	240	0.03
F	FTM080: 5000	-60	0.466
J	FTM080: 5000	-60	0.03
O	FTM080: 5000	-60	0.41481
T	FTM080: 5000	-60	1.8305
F	FTM080: 5000	-45	0.30571
J	FTM080: 5000	-45	0.34987
O	FTM080: 5000	-45	0.45424
T	FTM080: 5000	-45	0.03
F	FTM080: 5000	-30	0.45738
J	FTM080: 5000	-30	0.804633
O	FTM080: 5000	-30	0.35814
T	FTM080: 5000	-30	0.03
F	FTM080: 5000	-15	0.31869
J	FTM080: 5000	-15	0.3499
O	FTM080: 5000	-15	0.762697
T	FTM080: 5000	-15	0.587511
F	FTM080: 5000	0	0.85569
J	FTM080: 5000	0	0.03
O	FTM080: 5000	0	2.1036
T	FTM080: 5000	0	0.064248
F	FTM080: 5000	15	2.7394
J	FTM080: 5000	15	3.4604
O	FTM080: 5000	15	5.2794
T	FTM080: 5000	15	6.8267
F	FTM080: 5000	30	2.4062
J	FTM080: 5000	30	4.9609
O	FTM080: 5000	30	3.509
T	FTM080: 5000	30	2.915
F	FTM080: 5000	45	1.7296
J	FTM080: 5000	45	1.8449
O	FTM080: 5000	45	2.2272
T	FTM080: 5000	45	2.3072
F	FTM080: 5000	60	1.6869
J	FTM080: 5000	60	1.6492
O	FTM080: 5000	60	1.7591
T	FTM080: 5000	60	0.55291
F	FTM080: 5000	75	0.73354
J	FTM080: 5000	75	1.2354
O	FTM080: 5000	75	1.462
T	FTM080: 5000	75	0.7531
F	FTM080: 5000	90	1.08333
J	FTM080: 5000	90	0.99669
O	FTM080: 5000	90	0.92794
T	FTM080: 5000	90	0.03
F	FTM080: 5000	105	0.63139
J	FTM080: 5000	105	0.83122
O	FTM080: 5000	105	0.68555
T	FTM080: 5000	105	0.03
F	FTM080: 5000	120	0.991928
J	FTM080: 5000	120	0.59322
O	FTM080: 5000	120	0.83809
T	FTM080: 5000	120	0.49925
F	FTM080: 5000	135	1.5218
J	FTM080: 5000	135	0.73646
O	FTM080: 5000	135	0.58014
T	FTM080: 5000	135	0.36796
F	FTM080: 5000	150	0.03
J	FTM080: 5000	150	0.78366
O	FTM080: 5000	150	0.91621
T	FTM080: 5000	150	1.5822
F	FTM080: 5000	165	0.35409
J	FTM080: 5000	165	0.03
O	FTM080: 5000	165	0.03
T	FTM080: 5000	165	0.39953
F	FTM080: 5000	180	0.33336
J	FTM080: 5000	180	0.4187
O	FTM080: 5000	180	0.03
T	FTM080: 5000	180	2.8521
F	FTM080: 5000	195	0.25402
J	FTM080: 5000	195	0.15471
O	FTM080: 5000	195	0.40524
T	FTM080: 5000	195	1.4545
F	FTM080: 5000	210	2.0461
J	FTM080: 5000	210	0.18806
O	FTM080: 5000	210	0.03
T	FTM080: 5000	210	0.11787
F	FTM080: 5000	225	0.28527
J	FTM080: 5000	225	0.26304
O	FTM080: 5000	225	0.03
T	FTM080: 5000	225	0.03
F	FTM080: 5000	240	0.24233
J	FTM080: 5000	240	1.237
O	FTM080: 5000	240	0.03
T	FTM080: 5000	240	0.20807
